# Supplementary material for: Isolation and Characterization of Chi-like Salmonella Bacteriophages Infecting Two Salmonella enterica Serovars, Typhimurium and Enteritidis
Source: MDPI journal article supplement (doi:10.3390/pathogens11121480), 2022-12-06
Supplement: s1 [file s1]

Supplementary materials

# Isolation and Characterization of Chi-like *Salmonella* Bacteriophages Infecting Two *Salmonella enterica* Serovars, Typhimurium and Enteritidis

Addisu D. Teklemariam <sup>1</sup>, Mona G. Alharbi <sup>1</sup>, Rashad R. Al-Hindi <sup>1,\*</sup>, Ibrahim Alotibi <sup>2</sup>, Abdullah A. Aljaddawi <sup>1</sup>, Sheren A. Azhari <sup>1</sup> and Ahmed Esmael <sup>3,4,\*</sup>

<sup>1</sup> Department of Biological Sciences, Faculty of Science, King Abdulaziz University, Jeddah 21589, Saudi Arabia

<sup>2</sup> Health Information Technology Department, Applied College, King Abdulaziz University, Jeddah 21589, Saudi Arabia

<sup>3</sup> Botany and Microbiology Department, Faculty of Science, Benha University, Benha 13518, Egypt

<sup>4</sup> Nebraska Center for Virology, University of Nebraska-Lincoln, Lincoln, NE 68583, USA

\* Correspondence: rhindi@kau.edu.sa (R.R.A.-H.); a7medesmael@gmail.com (A.E.)

Supplementary Table S1 – ORFs of phage STP11

| ORFs  | Strand | Start codon | Start | stop  | Predicted function                      | E-value | Accession No |
|-------|--------|-------------|-------|-------|-----------------------------------------|---------|--------------|
| ORF1  | +      | ATG         | 774   | 2111  | hypothetical protein                    | 0.0     | NC_021779    |
| ORF2  | +      | ATG         | 2166  | 2762  | DUF2815 domain-containing protein       | 2e-114  | NC_031930    |
| ORF3  | +      | GTG         | 2871  | 4868  | hypothetical protein                    | 0.0     | NC_031930    |
| ORF4  | +      | ATG         | 5204  | 6679  | hypothetical protein                    | 0.0     | NC_031930    |
| ORF5  | +      | ATG         | 6666  | 7235  | Endonuclease                            | 1e-123  | NC_031930    |
| ORF6  | +      | ATG         | 7225  | 9300  | hypothetical protein                    | 0.0     | NC_031930    |
| ORF7  | +      | ATG         | 9562  | 11241 | Putative lambda family portal protein B | 0.0     | NC_021783    |
| ORF8  | +      | ATG         | 11283 | 12554 | Prohead protease ClpP                   | 0.0     | NC_021779    |
| ORF9  | +      | ATG         | 12584 | 12964 | Decorator protein D                     | 8e-69   | NC_021779    |
| ORF10 | +      | ATG         | 12977 | 14041 | Major capsid protein                    | 0.0     | NC_029045    |
| ORF11 | +      | ATG         | 14103 | 14396 | General stress protein                  | 7e-49   | NC_031930    |
| ORF12 | +      | ATG         | 14399 | 14764 | hypothetical protein                    | 3e-62   | NC_031930    |
| ORF13 | +      | ATG         | 14764 | 15390 | hypothetical protein                    | 6e-112  | NC_021779    |
| ORF14 | +      | ATG         | 15387 | 15890 | hypothetical protein                    | 3e-92   | NC_031930    |
| ORF15 | +      | ATG         | 15904 | 17043 | hypothetical protein                    | 0.0     | NC_029045    |
| ORF16 | +      | ATG         | 17140 | 17601 | hypothetical protein                    | 3e-81   | NC_031228    |
| ORF17 | +      | ATG         | 17646 | 17843 | XRE family transcriptional regulator    | 2e-32   | NC_031930    |
| ORF18 | +      | ATG         | 17836 | 22131 | Siderophore-interacting protein         | 0.0     | NC_031930    |
| ORF19 | +      | ATG         | 22137 | 23825 | hypothetical protein                    | 0.0     | NC_027991    |
| ORF20 | +      | ATG         | 23835 | 24653 | Tail tape measure protein               | 7e-162  | NC_031228    |
| ORF21 | +      | ATG         | 24665 | 24895 | hypothetical protein                    | 9e-39   | NC_031930    |
| ORF22 | +      | ATG         | 24895 | 25134 | hypothetical protein                    | 7e-41   | NC_031930    |
| ORF23 | +      | ATG         | 25124 | 29017 | Phage tail protein                      | 0.0     | NC_021780    |
| ORF24 | +      | ATG         | 29017 | 29757 | Terminase large subunit                 | 2e-144  | NC_031930    |
| ORF25 | +      | ATG         | 29767 | 30774 | Portal protein                          | 0.0     | NC_031930    |
| ORF26 | +      | ATG         | 30785 | 31747 | hypothetical protein                    | 0.0     | NC_031228    |
| ORF27 | +      | ATG         | 31761 | 32780 | hypothetical protein                    | 0.0     | NC_031228    |
| ORF28 | +      | ATG         | 33194 | 34021 | hypothetical protein                    | 2e-120  | NC_031228    |
| ORF29 | +      | GTG         | 34031 | 36160 | hypothetical protein                    | 0.0     | NC_031930    |
| ORF30 | +      | ATG         | 36223 | 36561 | Capsid scaffolding protein              | 1e-55   | NC_031930    |
| ORF31 | +      | ATG         | 36565 | 37278 | hypothetical protein                    | 2e-132  | NC_031930    |
| ORF32 | -      | ATG         | 37284 | 37454 | Major capsid protein                    | 6e-26   | NC_031930    |
| ORF33 | +      | ATG         | 37456 | 37659 | hypothetical protein                    | 2e-33   | NC_031228    |
| ORF34 | -      | ATG         | 37660 | 38121 | hypothetical protein                    | 1e-78   | NC_031228    |
| ORF35 | -      | ATG         | 38118 | 38402 | hypothetical protein                    | 1e-52   | NC_021783    |
| ORF36 | -      | ATG         | 38478 | 39191 | hypothetical protein                    | 8e-137  | NC_031930    |
| ORF37 | -      | ATG         | 39188 | 39451 | hypothetical protein                    | 2e-43   | NC_021779    |
| ORF38 | -      | ATG         | 39453 | 39752 | hypothetical protein                    | 1e-50   | NC_031930    |

|       |   |     |       |       |                                      |        |           |
|-------|---|-----|-------|-------|--------------------------------------|--------|-----------|
| ORF39 | - | ATG | 39749 | 40030 | hypothetical protein                 | 1e-47  | NC_031930 |
| ORF40 | - | ATG | 40111 | 40623 | hypothetical protein                 | 2e-90  | NC_021780 |
| ORF41 | - | ATG | 40605 | 40859 | hypothetical protein                 | 3e-46  | NC_021779 |
| ORF42 | - | ATG | 40849 | 41070 | hypothetical protein                 | 3e-36  | NC_021779 |
| ORF43 | - | ATG | 41067 | 41261 | hypothetical protein                 | 3e-32  | NC_031930 |
| ORF44 | - | ATG | 41272 | 42246 | Tail tape measure protein            | 8e-120 | NC_031930 |
| ORF45 | - | ATG | 42324 | 43010 | N-6-adenine-methyltransferase        | 1e-132 | NC_031228 |
| ORF46 | - | ATG | 43010 | 44110 | hypothetical protein                 | 0.0    | NC_031228 |
| ORF47 | - | ATG | 44107 | 44565 | hypothetical protein                 | 1e-81  | NC_031930 |
| ORF48 | - | ATG | 44709 | 45449 | hypothetical protein                 | 6e-146 | NC_025442 |
| ORF49 | - | ATG | 45645 | 45920 | endolysin                            | 3e-52  | NC_029045 |
| ORF50 | - | ATG | 45925 | 46158 | hypothetical protein                 | 2e-38  | NC_031228 |
| ORF51 | - | ATG | 46161 | 47234 | hypothetical protein                 | 0.0    | NC_031228 |
| ORF52 | - | GTG | 47215 | 47556 | hypothetical protein                 | 2e-57  | NC_021783 |
| ORF53 | - | ATG | 47543 | 47878 | Viral integrase family 4             | 1e-60  | NC_029045 |
| ORF54 | - | ATG | 47865 | 48305 | hypothetical protein                 | 3e-76  | NC_031228 |
| ORF55 | - | ATG | 48377 | 48748 | Replication protein DnaD             | 2e-63  | NC_031228 |
| ORF56 | + | ATG | 49509 | 49769 | RecT family recombinase              | 2e-36  | NC_031228 |
| ORF57 | + | ATG | 49783 | 50322 | hypothetical protein                 | 3e-101 | NC_025442 |
| ORF58 | - | CTG | 50383 | 50502 | Transposase                          | 3e-16  | NC_029045 |
| ORF59 | + | ATG | 50540 | 51022 | hypothetical protein                 | 1e-79  | NC_021779 |
| ORF60 | + | ATG | 51034 | 51237 | hypothetical protein                 | 3e-30  | NC_031228 |
| ORF61 | + | ATG | 51248 | 51796 | kilA anti-repressor protein          | 1e-100 | NC_031228 |
| ORF62 | + | ATG | 51793 | 52014 | XRE family transcriptional regulator | 5e-37  | NC_031228 |
| ORF63 | + | ATG | 52140 | 53309 | Putative Cro/C1-type repressor       | 0.0    | NC_031228 |
| ORF64 | + | ATG | 53321 | 53593 | hypothetical protein                 | 3e-48  | NC_031228 |
| ORF65 | + | ATG | 53596 | 53802 | hypothetical protein                 | 3e-35  | NC_021779 |
| ORF66 | + | ATG | 53795 | 54046 | hypothetical protein                 | 8e-40  | NC_031228 |
| ORF67 | + | ATG | 54039 | 54290 | Serine recombinase                   | 9e-41  | NC_031228 |
| ORF68 | + | ATG | 55585 | 55728 | HTH DNA binding domain protein       | 2e-20  | NC_025442 |
| ORF69 | - | ATG | 55769 | 58354 | hypothetical protein                 | 0.0    | NC_031930 |
| ORF70 | - | ATG | 58351 | 58632 | hypothetical protein                 | 2e-50  | NC_031228 |

Supplementary Table S2 – ORFs of phage SEP13

| ORF   | Strand | Start codon | Start | stop  | Predicted function                      | E-value | Accession No                |
|-------|--------|-------------|-------|-------|-----------------------------------------|---------|-----------------------------|
| ORF1  | -      | GCG         | 1311  | 2138  | hypothetical protein                    | 2e-120  | NC_031228                   |
| ORF2  | -      | ATG         | 2552  | 3571  | hypothetical protein                    | 0.0     | NC_031228                   |
| ORF3  | -      | ATG         | 3585  | 4547  | hypothetical protein                    | 0.0     | NC_031228                   |
| ORF4  | -      | ATG         | 4558  | 5499  | hypothetical protein                    | 6e-173  | NC_031228                   |
| ORF5  | -      | ATG         | 5575  | 6315  | Putative tail fiber protein             | 2e-144  | <a href="#">YP_00823986</a> |
| ORF6  | -      | ATG         | 6315  | 10208 | Phage tail protein                      | 0.0     | NC_021780                   |
| ORF7  | -      | ATG         | 10198 | 10437 | hypothetical protein                    | 7e-41   | NC_031930                   |
| ORF8  | -      | ATG         | 10437 | 10667 | hypothetical protein                    | 9e-39   | NC_031930                   |
| ORF9  | -      | ATG         | 10679 | 11497 | Phage BR0599 family protein             | 7e-162  | NC_031228                   |
| ORF10 | -      | ATG         | 11507 | 13195 | hypothetical protein                    | 0.0     | NC_027991                   |
| ORF11 | -      | ATG         | 13201 | 17496 | Tape measure protein                    | 0.0     | YP_00999882                 |
| ORF12 | -      | ATG         | 17731 | 18192 | hypothetical protein                    | 3e-81   | NC_031228                   |
| ORF13 | -      | ATG         | 18289 | 19428 | hypothetical protein                    | 0.0     | NC_029045                   |
| ORF14 | -      | ATG         | 19442 | 19945 | hypothetical protein                    | 3e-92   | NC_031930                   |
| ORF15 | -      | ATG         | 19942 | 20568 | hypothetical protein                    | 0.0     | NC_021779                   |
| ORF16 | -      | ATG         | 20568 | 20933 | hypothetical protein                    | 3e-62   | NC_031930                   |
| ORF17 | -      | ATG         | 20936 | 21229 | General stress protein                  | 7e-49   | YP_00805817                 |
| ORF18 | -      | ATG         | 21291 | 22355 | Major capsid protein                    | 0.0     | NC_029045                   |
| ORF19 | -      | ATG         | 22368 | 22763 | Decorator protein D                     | 8e-69   | NC_021779                   |
| ORF20 | -      | ATG         | 22778 | 24049 | Prohead protease ClpP                   | 0.0     | NC_021779                   |
| ORF21 | -      | ATG         | 24091 | 25770 | Putative lambda family portal protein B | 0.0     | NC_021783                   |
| ORF22 | -      | ATG         | 25767 | 26021 | hypothetical protein                    | 7e-44   | NC_031930                   |
| ORF23 | -      | ATG         | 26032 | 28107 | Terminase large subunit                 | 0.0     | NC_021780                   |
| ORF24 | -      | ATG         | 28097 | 28666 | DUF1441 family protein                  | 7e-138  | WP_01605615                 |
| ORF25 | -      | ATG         | 28653 | 30128 | Helicase family protein                 | 0.0     | YP_01016135                 |
| ORF26 | -      | ATG         | 30175 | 30462 | hypothetical protein                    | 3e-52   | NC_031228                   |
| ORF27 | -      | ATG         | 30464 | 32401 | Putative DNA polymerase                 | 0.0     | <a href="#">YP_00999960</a> |
| ORF28 | -      | ATG         | 32570 | 33166 | hypothetical protein                    | 9e-123  | <a href="#">YP_00823983</a> |
| ORF29 | -      | ATG         | 33221 | 34558 | hypothetical protein                    | 0.0     | NC_021779                   |
| ORF30 | -      | ATG         | 34943 | 35347 | hypothetical protein                    | 0.0     | NC_031930                   |
| ORF31 | +      | ATG         | 35626 | 35871 | hypothetical protein                    | 3e-42   | NC_031930                   |
| ORF32 | +      | ATG         | 35868 | 38453 | hypothetical protein                    | 0.0     | NC_031930                   |
| ORF33 | -      | ATG         | 38494 | 38637 | HTH DNA binding domain protein          | 2e-20   | NC_025442                   |
| ORF34 | -      | ATG         | 39935 | 40186 | Serine recombinase                      | 1e-48   | YP_00922147                 |
| ORF35 | -      | ATG         | 40179 | 40430 | hypothetical protein                    | 8e-40   | NC_031228                   |
| ORF36 | -      | ATG         | 40423 | 40629 | hypothetical protein                    | 3e-35   | NC_021779                   |
| ORF37 | -      | ATG         | 40632 | 40904 | hypothetical protein                    | 3e-48   | NC_031228                   |

|       |   |     |       |       |                                      |        |              |
|-------|---|-----|-------|-------|--------------------------------------|--------|--------------|
| ORF38 | - | ATG | 40916 | 42085 | Putative Cro/C1-type repressor       | 0.0    | NC_031228    |
| ORF39 | - | ATG | 42211 | 42432 | XRE family transcriptional regulator | 5e-37  | NC_031228    |
| ORF40 | - | ATG | 42429 | 42977 | kilA anti-repressor protein          | 1e-100 | NC_031228    |
| ORF41 | - | ATG | 42988 | 43191 | hypothetical protein                 | 3e-30  | NC_031228    |
| ORF42 | - | ATG | 43203 | 43685 | hypothetical protein                 | 1e-79  | NC_021779    |
| ORF43 | + | CTG | 43723 | 43842 | Transposase                          | 3e-16  | NC_029045    |
| ORF44 | - | ATG | 43903 | 44538 | Hypothetical protein                 | 4e-127 | YP_008058147 |
| ORF45 | - | ATG | 44456 | 44716 | RecT family recombinase              | 2e-36  | NC_031228    |
| ORF46 | + | ATG | 45477 | 45848 | Replication protein DnaD             | 2e-63  | NC_031228    |
| ORF47 | + | ATG | 45920 | 46360 | hypothetical protein                 | 1e-81  | NC_031930    |
| ORF48 | + | ATG | 46347 | 46682 | Viral integrase family 4             | 1e-60  | NC_029045    |
| ORF49 | + | ATG | 46648 | 47010 | hypothetical protein                 | 3e-52  | NC_021783    |
| ORF50 | + | ATG | 46991 | 48064 | hypothetical protein                 | 0.0    | NC_031228    |
| ORF51 | + | ATG | 48067 | 48300 | General stress protein               | 2e-38  | NC_031228    |
| ORF52 | + | ATG | 48305 | 48580 | Endolysin                            | 2e-57  | NC_021783    |
| ORF53 | + | ATG | 48776 | 49516 | hypothetical protein                 | 6e-146 | NC_025442    |
| ORF54 | + | ATG | 49660 | 50118 | hypothetical protein                 | 3e-76  | NC_031930    |
| ORF55 | + | ATG | 50115 | 51215 | hypothetical protein                 | 0.0    | NC_031228    |
| ORF56 | + | ATG | 51215 | 51901 | Putative adenine-methyltransferase   | 7e-169 | WP_14003178  |
| ORF57 | + | ATG | 51979 | 52953 | Tail tape measure protein            | 8e-120 | NC_031930    |
| ORF58 | + | ATG | 52964 | 53158 | hypothetical protein                 | 3e-32  | NC_031930    |
| ORF59 | + | ATG | 53155 | 53376 | hypothetical protein                 | 3e-36  | NC_021779    |
| ORF60 | + | ATG | 53366 | 53620 | hypothetical protein                 | 3e-46  | NC_021779    |
| ORF61 | + | ATG | 53602 | 54114 | hypothetical protein                 | 2e-90  | NC_021780    |
| ORF62 | + | ATG | 54195 | 54476 | hypothetical protein                 | 1e-47  | NC_031930    |
| ORF63 | + | ATG | 54473 | 54772 | hypothetical protein                 | 1e-50  | NC_031930    |
| ORF64 | + | ATG | 54774 | 55037 | hypothetical protein                 | 2e-43  | NC_021779    |
| ORF65 | + | ATG | 55043 | 55747 | hypothetical protein                 | 1e-135 | NC_031930    |
| ORF66 | + | ATG | 55823 | 56107 | hypothetical protein                 | 1e-52  | NC_021783    |
| ORF67 | + | ATG | 56104 | 56565 | Deoxyribosyl transferase             | 1e-78  | NC_031228    |
| ORF68 | - | GTG | 56566 | 56745 | hypothetical protein                 | 4e-29  | NC_031228    |
| ORF69 | - | ATG | 56696 | 56950 | Capsid scaffolding protein           | 3e-43  | NC_031228    |
| ORF70 | - | ATG | 56947 | 57660 | hypothetical protein                 | 2e-132 | NC_031930    |
| ORF71 | - | ATG | 57664 | 58002 | Putative endolysin 2                 | 2e-73  | WP_01605612  |

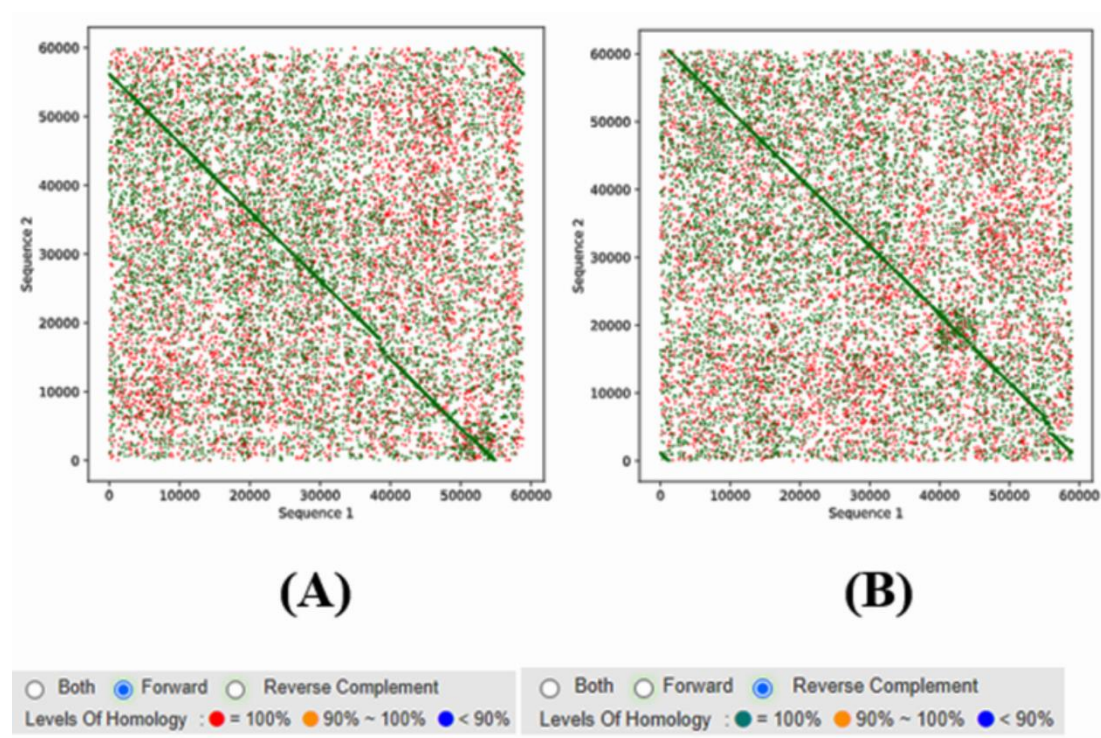

**Supplementary Figure S1.** A two-dimensional dot plot showing the level of homology between two the phages sequences. **(A)** sequence 1 (X -axis) represents the whole genome sequence of phage STP11 and sequence 2 (Y-axis) represents Salmonella phage ST-374 (NC\_052998.1). **(B)** Sequence 1 (X-axis) represents the complete genome sequence of phage SEP13 and sequence 2 (Y-axis) represents Salmonella phage ER24 (NC\_052999.1). The red and green dots represent the level of homology in both forward and reverse complement directions.
